# Supplementary material
Source: PubMed Central journal article supplement (PMC6093321)
Supplement: wxy052_suppl_supplementary_material.pdf [file wxy052_suppl_supplementary_material.pdf]

**DEVELOPMENT OF A CODING AND CROSSWALK TOOL  
FOR OCCUPATIONS AND INDUSTRIES**

Rémen T<sup>1</sup>, Richardson L<sup>1</sup>, Pilorget C<sup>2,3</sup>, Palmer G<sup>4</sup>, Siemiatycki J<sup>1</sup>, Lavoué J<sup>1</sup>

<sup>1</sup> University of Montreal Hospital Research Center (CRCHUM), Montreal, Canada

<sup>2</sup> The French Public Health Agency, Saint Maurice, France

<sup>3</sup> Univ Lyon, University of Claude Bernard Lyon1, Ifsttar, UMRESTTE, UMR T\_9405, F- 69373, Lyon, France.

<sup>4</sup> French Center for Research and Development in Medical Informatics (CREDIM), ISPED, Bordeaux, France

**Table S1: Proportion of jobs in a database of occupational histories (31,673 jobs) for which the CAPS-Canada crosswalk assistant allowed linkage between pairs of industry classification systems**

| Given classification | Target classification | Proportion of jobs linkable with the full crosswalk assistant |                                     | Proportion of jobs linkable with only “official” links |       |
|----------------------|-----------------------|---------------------------------------------------------------|-------------------------------------|--------------------------------------------------------|-------|
|                      |                       | < 10 codes proposed <sup>α</sup>                              | direct link to one job <sup>β</sup> | < 10 jobs                                              | 1 job |
| ISIC-1971            | NAICS-2012            | 78.7%                                                         | 17.3%                               | 18.2%                                                  | 2.3%  |
| ISIC-1971            | SIC-1980              | 71.9%                                                         | 21.0%                               | 19.3%                                                  | 1.6%  |
| NAICS-2012           | SIC-1980              | 100.0%                                                        | 74.4%                               | 94.4%                                                  | 47.7% |
| NAICS-2012           | ISIC-1971             | 99.4%                                                         | 90.4%                               | 87.2%                                                  | 35.5% |
| SIC-1980             | ISIC-1971             | 99.0%                                                         | 90.9%                               | 77.8%                                                  | 32.6% |
| SIC-1980             | NAICS-2012            | 99.6%                                                         | 80.0%                               | 93.0%                                                  | 40.9% |

For each possible pair of starting / target classifications was evaluated for what proportion of jobs in our database the crosswalk from the starting to the target classification would lead to:

<sup>α</sup> “< 10 codes proposed” = useful information provided

<sup>β</sup> “direct link to 1 code” = univocal links

**Table S2: Inter-rater reliability in industry coding between the two coders for each classification used**

|              | Resolution level<br>(number of Digit) | Number of<br>corresponding codes<br>at the resolution level | Inter-rater reliability in<br>job coding [95% CI] - All<br>approaches combined |
|--------------|---------------------------------------|-------------------------------------------------------------|--------------------------------------------------------------------------------|
| ISIC (1971)  | 4                                     | 159                                                         | 78.5% [75.9% -81.1%]                                                           |
|              | 3                                     | 71                                                          | 81.1% [78.6% -83.6%]                                                           |
| SIC (1980)   | 4                                     | 860                                                         | 64.1% [61.1% -67.1%]                                                           |
|              | 3                                     | 318                                                         | 71.3% [68.4% -74.2%]                                                           |
| SCIAN (2012) | 6                                     | 922                                                         | 63.2% [60.2% -66.2%]                                                           |
|              | 5                                     | 711                                                         | 67.3% [64.3% -70.3%]                                                           |
|              | 4                                     | 323                                                         | 71.5% [68.7% -74.3%]                                                           |
|              | 3                                     | 102                                                         | 78.2% [75.6% -80.8%]                                                           |

**Table S3: Correspondences between industry classifications based on “official” crosswalks**

|                         |                    | Target classification       |                             |                                                                                             |                             |                                                                                             |                             |                                                                                             |
|-------------------------|--------------------|-----------------------------|-----------------------------|---------------------------------------------------------------------------------------------|-----------------------------|---------------------------------------------------------------------------------------------|-----------------------------|---------------------------------------------------------------------------------------------|
|                         |                    | 6-digit NAICS-2012          |                             | 4-digit SIC-1980                                                                            |                             | 4-digit ISIC-1971                                                                           |                             |                                                                                             |
|                         |                    | $N_{\text{Codes}}^{\alpha}$ | $N_{\text{Tables}}^{\beta}$ | Median<br>[5 <sup>th</sup> - 95 <sup>th</sup><br>percentile] <sup><math>\gamma</math></sup> | $N_{\text{Tables}}^{\beta}$ | Median<br>[5 <sup>th</sup> - 95 <sup>th</sup><br>percentile] <sup><math>\gamma</math></sup> | $N_{\text{Tables}}^{\beta}$ | Median<br>[5 <sup>th</sup> - 95 <sup>th</sup><br>percentile] <sup><math>\gamma</math></sup> |
| Starting classification | 6-digit NAICS-2012 | 922                         |                             |                                                                                             | 2                           | 1 [1 - 5]                                                                                   | 2                           | 2 [1 - 23]                                                                                  |
|                         | 4-digit SIC-1980   | 860                         | 2                           | 1 [1 - 6]                                                                                   |                             |                                                                                             | 2                           | 2 [1 - 37]                                                                                  |
|                         | 4-digit ISIC-1971  | 158                         | 2                           | 20 [1.9 - 99.6]                                                                             | 2                           | 26 [2 - 109.5]                                                                              |                             |                                                                                             |

<sup>$\alpha$</sup>  Number of different codes for the classification

<sup>$\beta$</sup>  Number of intermediate tables used between the starting and target classifications for “official” crosswalks

<sup>$\gamma$</sup>  Median and values of the 5<sup>th</sup> and 95<sup>th</sup> percentile of the distribution of numbers of possible codes in the target classification linked with each code in the starting classification

**Table S4: Relative contribution of the different types of link covered by the crosswalk assistant**

|               |               | Proportion of jobs in a database of occupational histories (31,673 jobs) for which crosswalks provide useful information |                                            |             |            |                                 |                                            |             |            |
|---------------|---------------|--------------------------------------------------------------------------------------------------------------------------|--------------------------------------------|-------------|------------|---------------------------------|--------------------------------------------|-------------|------------|
| Origin system | Target system | ≤ 10 jobs proposed                                                                                                       |                                            |             |            | Direct link to 1 code           |                                            |             |            |
|               |               | All links combined <sup>β</sup>                                                                                          | By type of link (exclusively) <sup>α</sup> |             |            | All links combined <sup>β</sup> | By type of link (exclusively) <sup>α</sup> |             |            |
|               |               |                                                                                                                          | "Expert"                                   | "Empirical" | "Official" |                                 | "Expert"                                   | "Empirical" | "Official" |
| ISIC-1971     | NAICS-2012    | 78.7%                                                                                                                    | 0%                                         | 78.5%       | 0.1%       | 17.3%                           | 0%                                         | 17.2%       | 0.0%       |
| ISIC-1971     | SIC-1980      | 71.9%                                                                                                                    | 0%                                         | 71.8%       | 0.1%       | 21.0%                           | 0%                                         | 21.0%       | 0.0%       |
| NAICS-2012    | SIC-1980      | 100.0%                                                                                                                   | 0%                                         | 95.3%       | 4.7%       | 74.4%                           | 0%                                         | 71.3%       | 3.1%       |
| NAICS-2012    | ISIC-1971     | 99.4%                                                                                                                    | 0%                                         | 95.3%       | 4.1%       | 90.4%                           | 0%                                         | 87.1%       | 3.4%       |
| SIC-1980      | ISIC-1971     | 99.0%                                                                                                                    | 2.4%                                       | 94.0%       | 2.6%       | 90.9%                           | 2.4%                                       | 86.8%       | 1.8%       |
| SIC-1980      | NAICS-2012    | 99.6%                                                                                                                    | 9.6%                                       | 86.8%       | 3.2%       | 80.0%                           | 9.6%                                       | 68.5%       | 1.9%       |

<sup>α</sup> The category of links was ranked from the most to the less informative. When a link is available for a starting code, links at the lower levels were not sought

<sup>β</sup> The sum can vary due to rounding

**Figure S1: Inter-rater reliability (and 95% confidence interval) in industry coding according to the approach used**

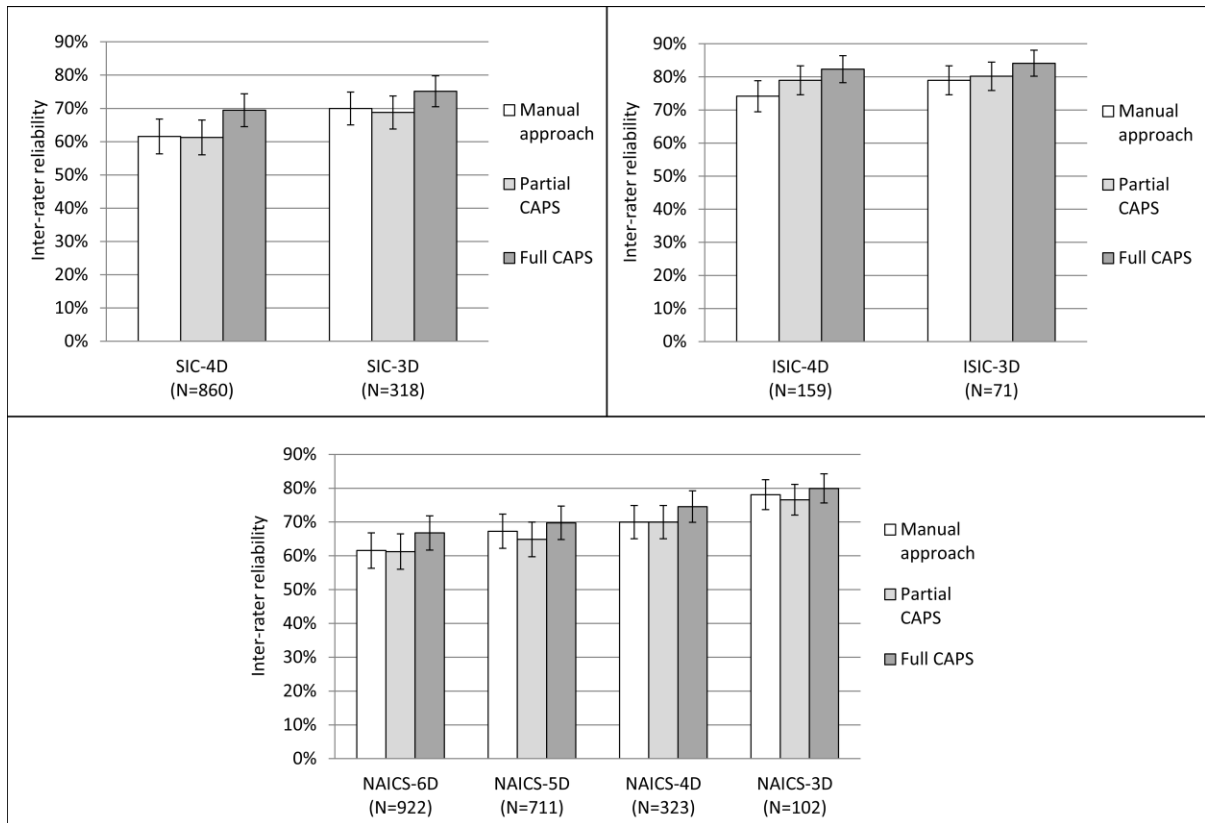

Manual approach: manual coding based on published version of the classifications - Partial CAPS: CAPS coding assistant + “official” crosswalk assistant - Full CAPS: the full CAPS-Canada tool including all crosswalk types

Classifications and versions retained: SIC-1980, ISIC-1971 and NAICS-2012

The figures following the classification indicate the number of digits kept and the number in brackets refers to the number of different codes for the classification/resolution level combination
